# Supplementary material
Source: publisher site journal article supplement (https://www.dovepress.com/get_supplementary_file.php?f=291001.docx)
Supplement: Supplementary file 1 [file get_supplementary_file.php]

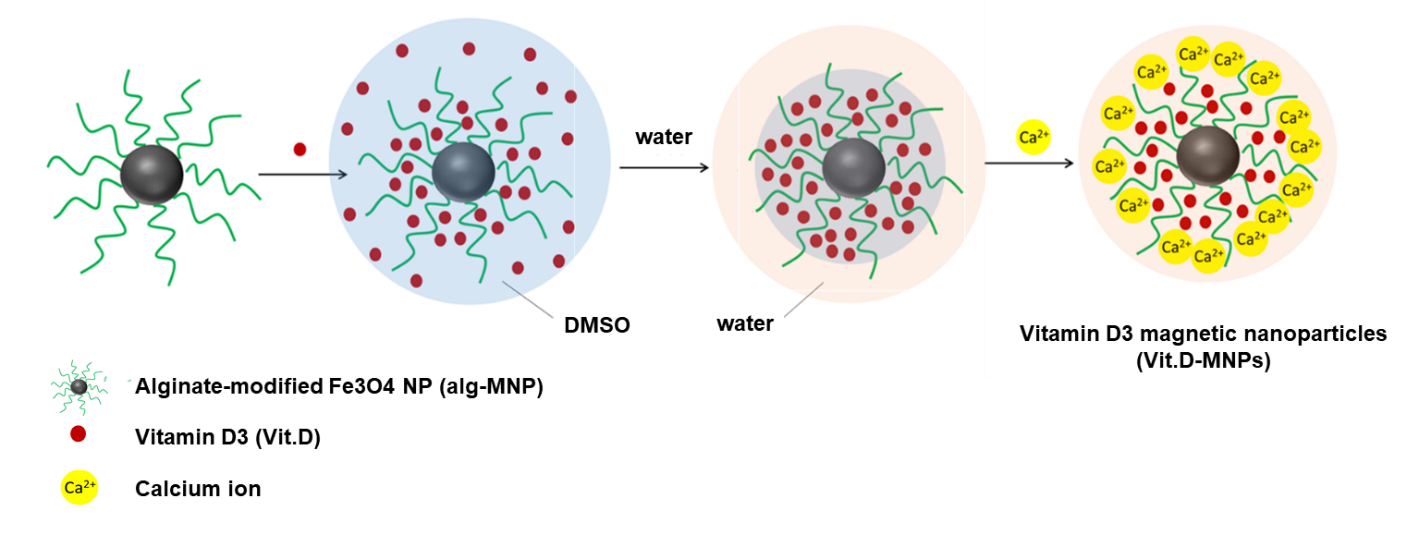


**Supplementary Figure 1. The schematic synthesis process of Vit.D-MNPs.**

**
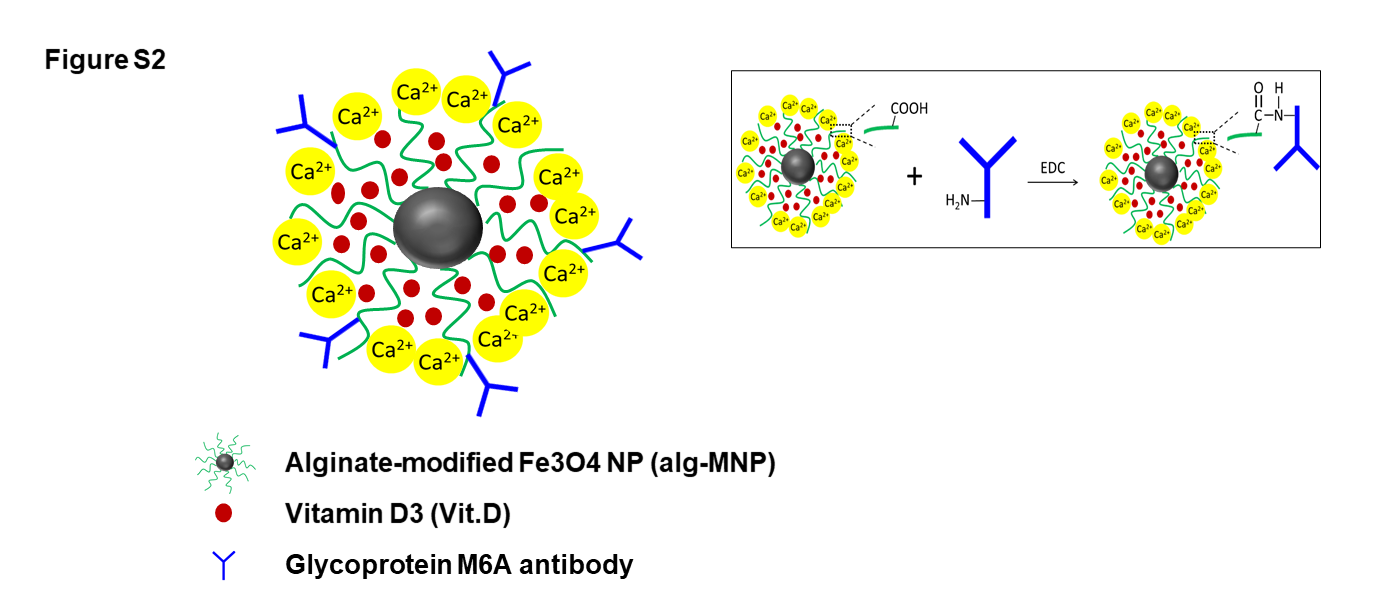
**

**Supplementary Figure 2. The chemical structure of chemical reaction of alg-MNP and antibody. EDC is a cross-linker to rapidly form an amide bond.**


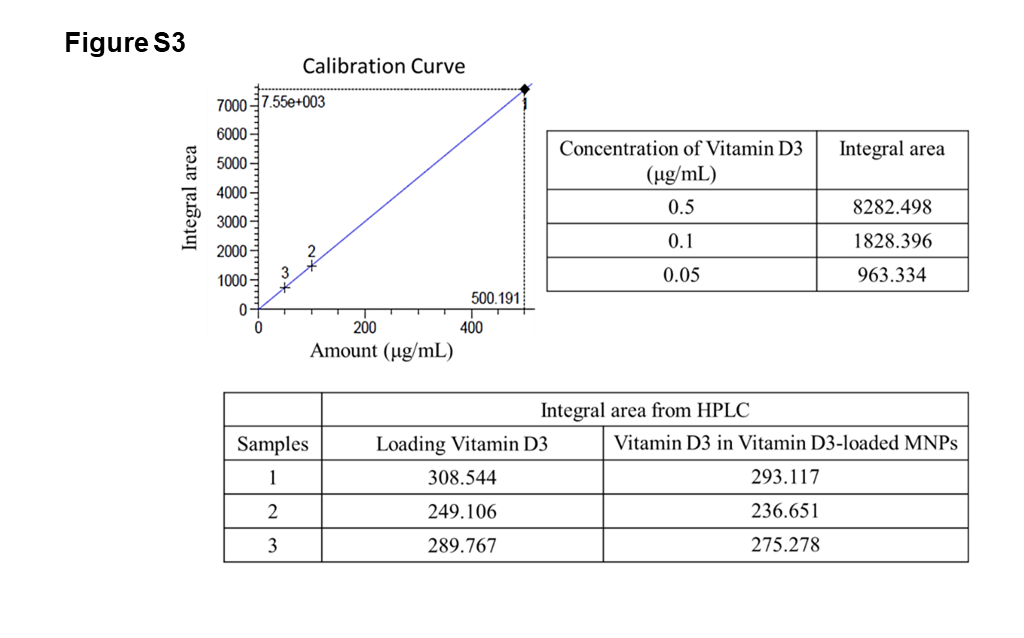


**Supplementary Figure 3. The HPLC data of calibration curve and real samples (Vit.D-MNPs).**

**
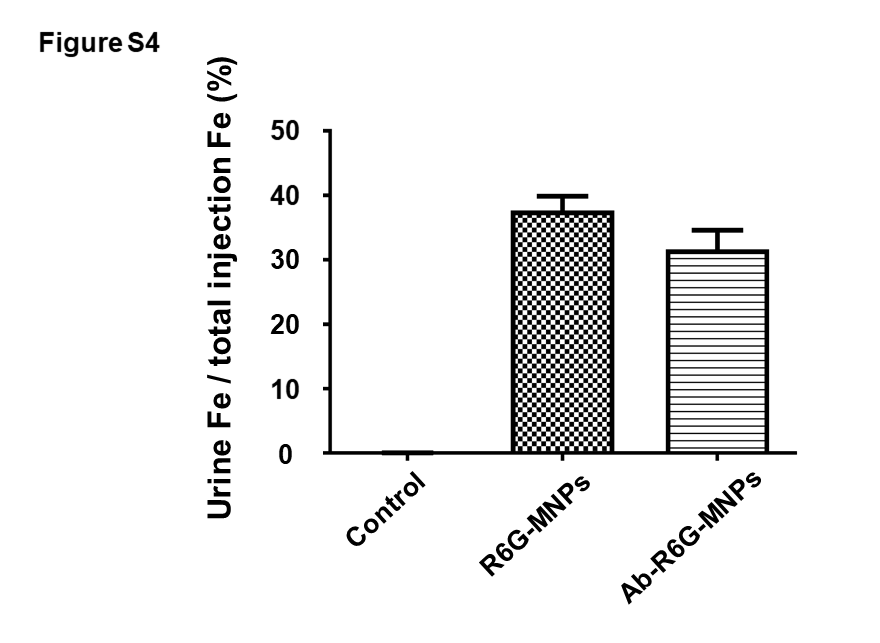
**

**Supplementary Figure 4. The spot urine Fe content 72 h after nanoparticles injection.**


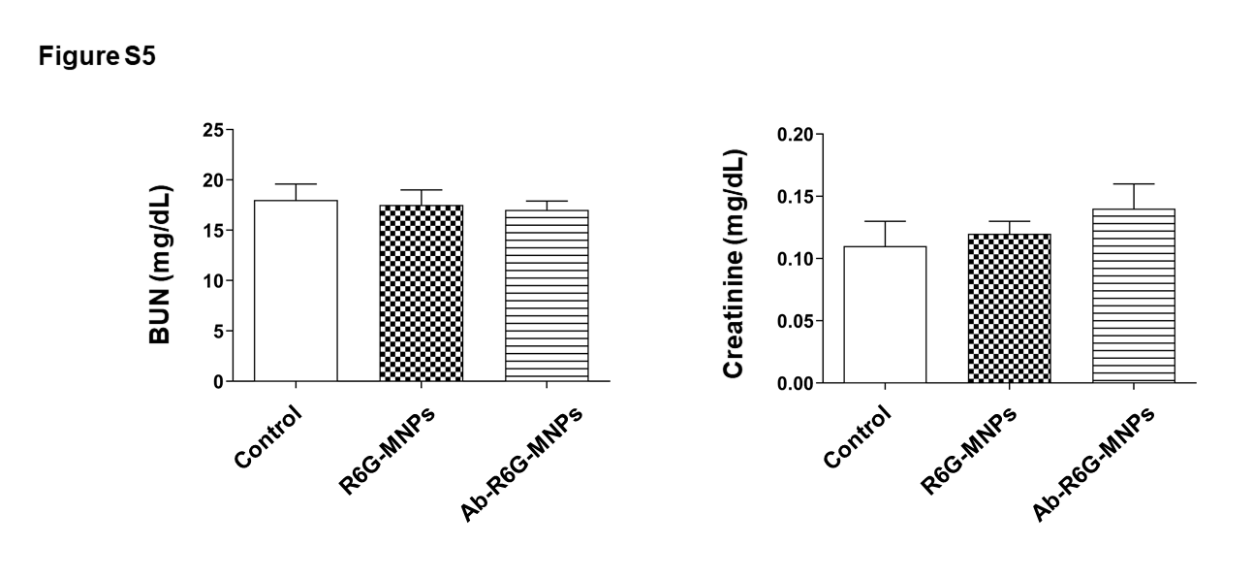


**Supplementary Figure 5. The renal function 72h after nanoparticles injection.**


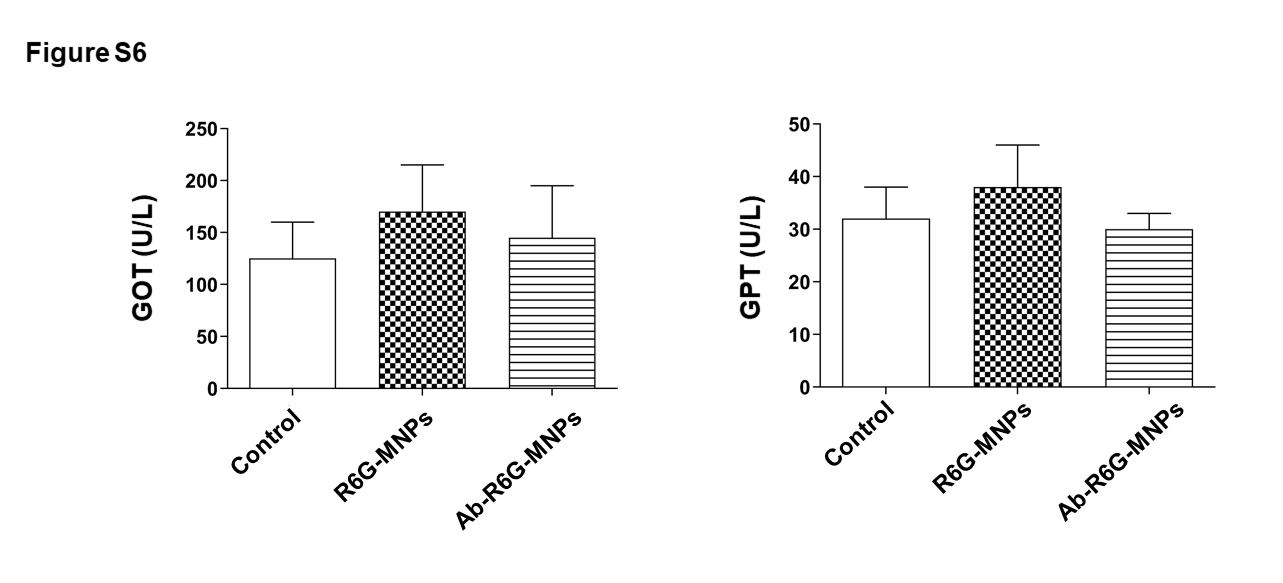


**Supplementary Figure 6. The liver function 72h after nanoparticles injection.**
